# Supplementary material for: TRPML1 gating modulation by allosteric mutations and lipids (Design of allosteric mutations that recapitulate the gating of TRPML1 )
Source: PubMed Central journal article supplement (PMC11245044; doi:10.1101/2024.07.04.602033), 2024-07-06
Supplement: NIHPP2024.07.04.602033v1-supplement-1.pdf [file NIHPP2024.07.04.602033v1-supplement-1.pdf]

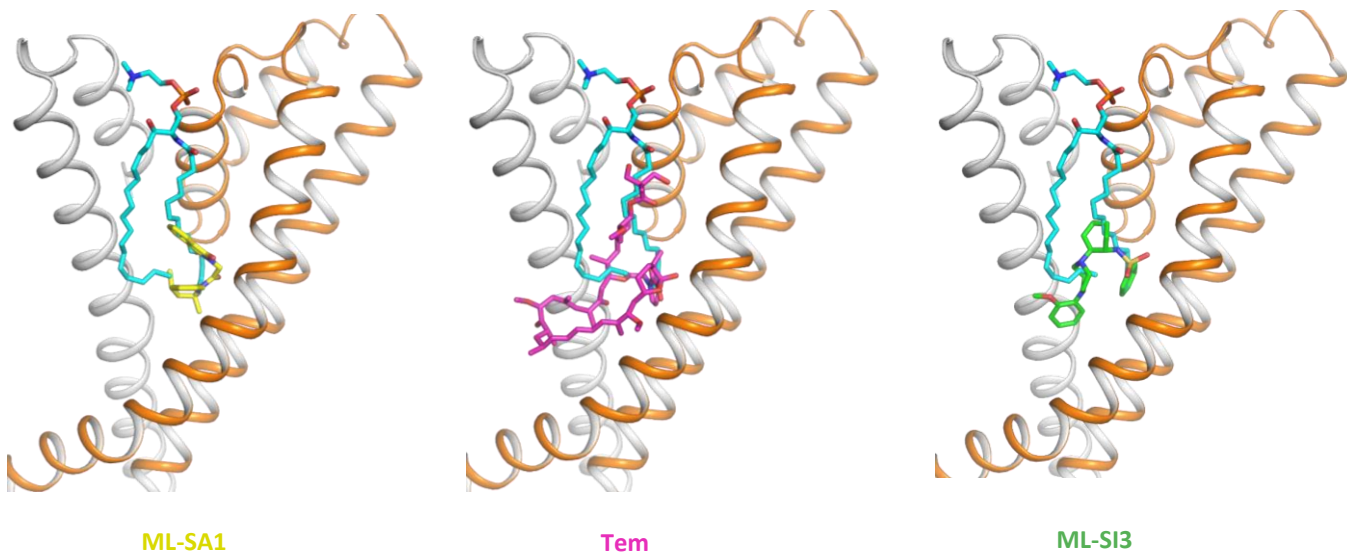

**Figure supplement 1. Sphingomyelin (cyan) binding overlaps with that of agonist ML-SA1 (yellow), rapamycin analog Tem (magenta), or antagonist ML-SI3 (green).**

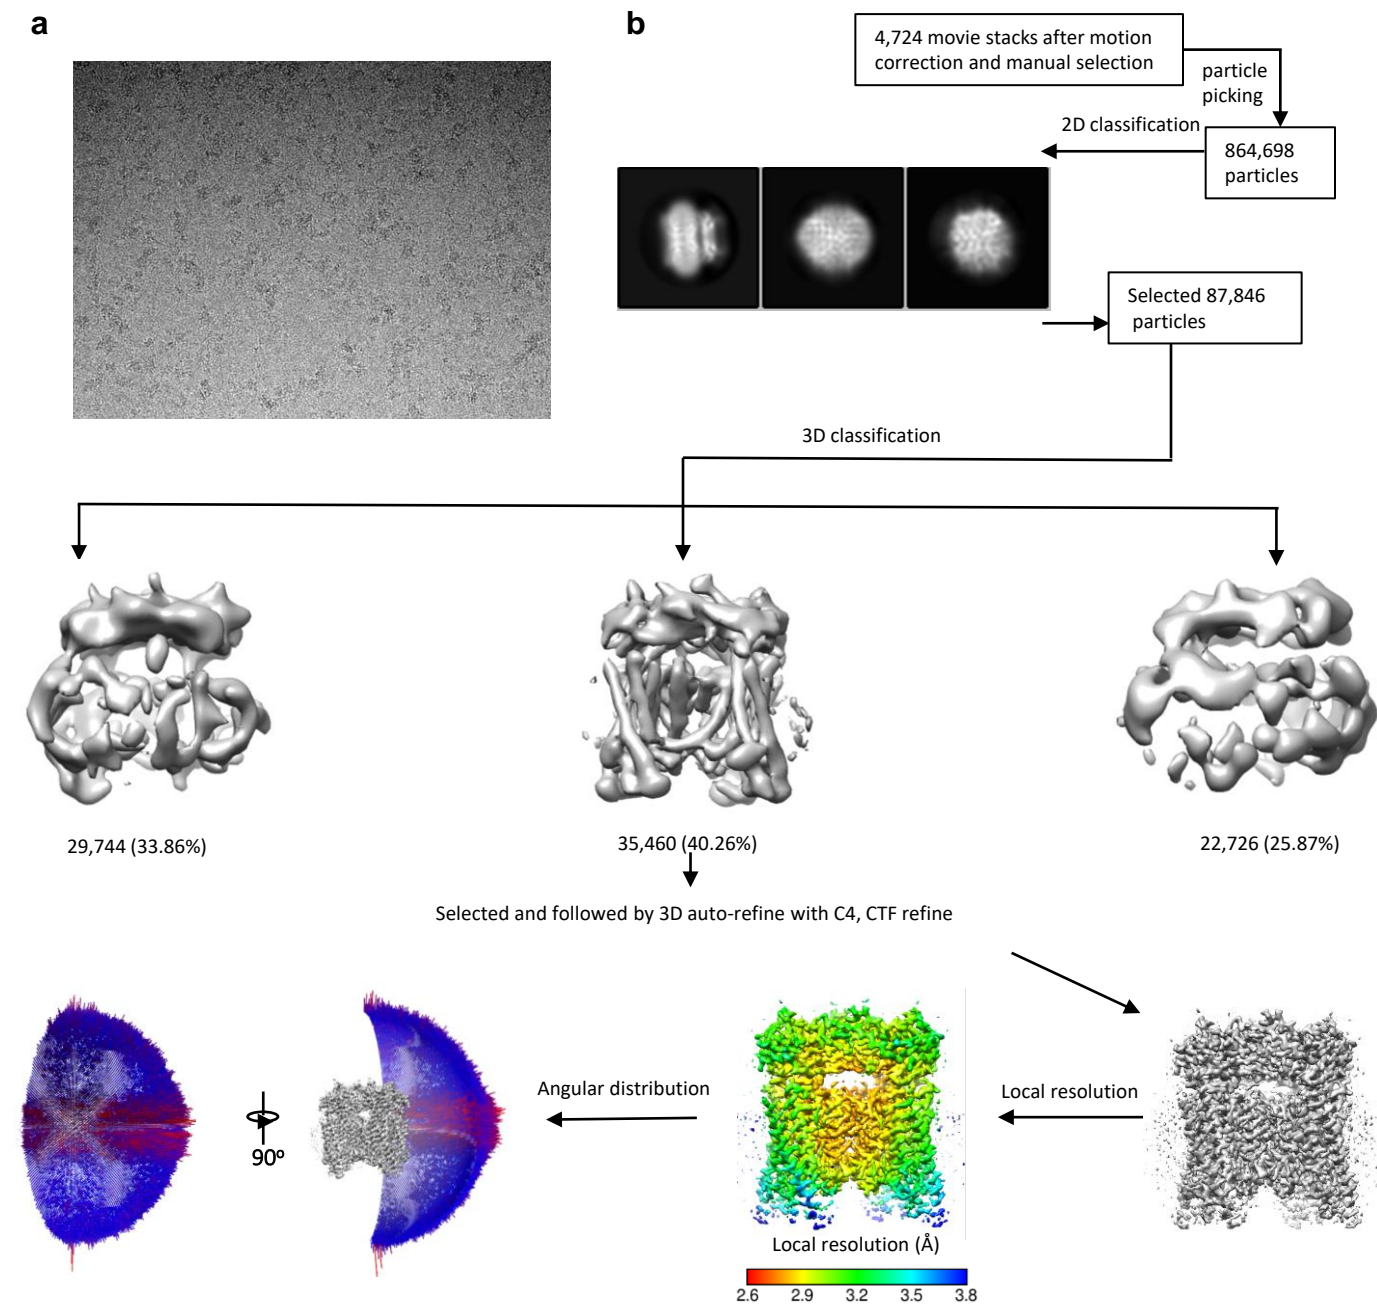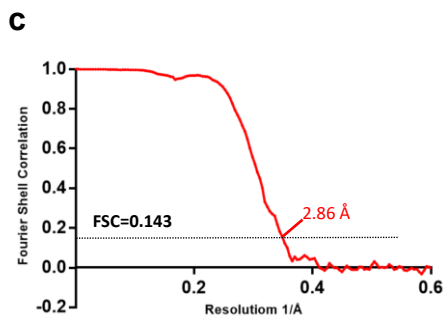

**Figure supplement 2: Cryo-EM data processing scheme of the TRPML1 Y404W.** (a) Representative micrograph. (b) Flow chart of the cryo-EM data processing procedure and the Euler angle distribution of particles used in the final three-dimensional reconstruction. Selected 2D class averages are shown. The final structure represent an open state. (c) Fourier Shell Correlation curves showing the overall resolution at FSC=0.143.

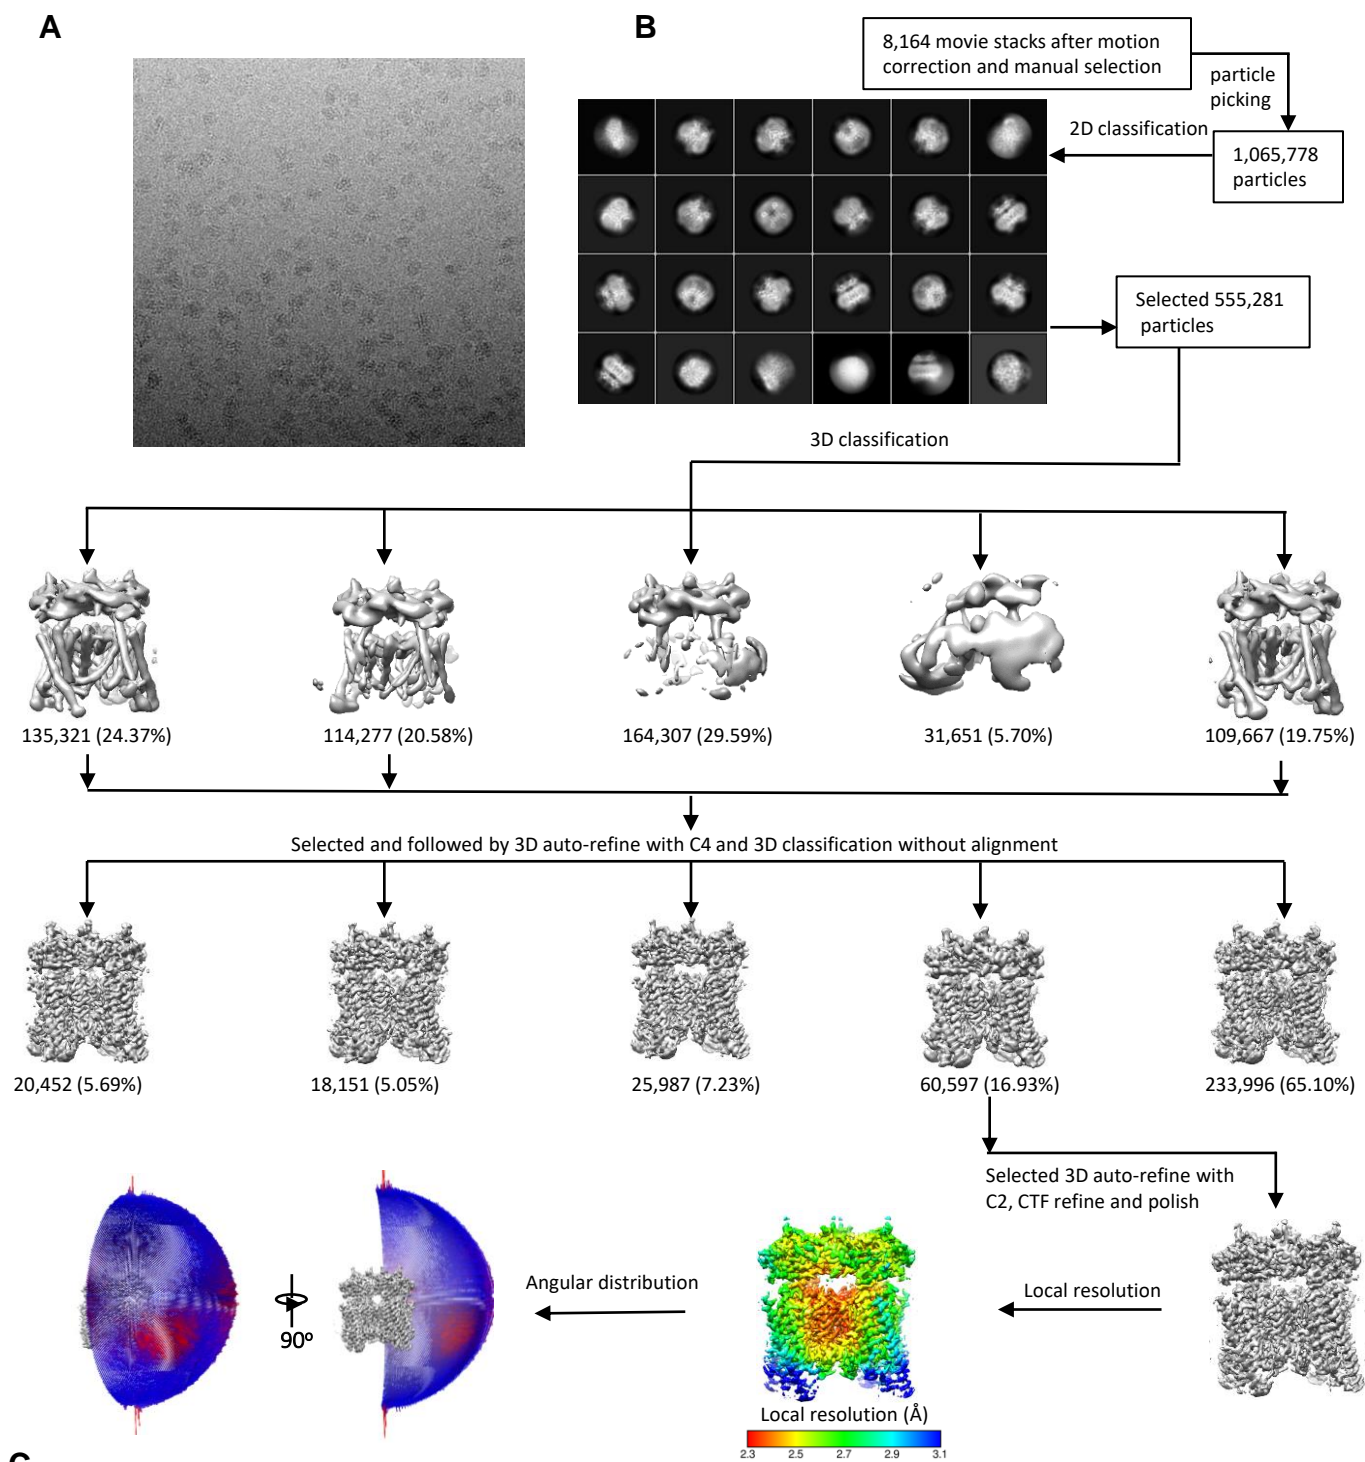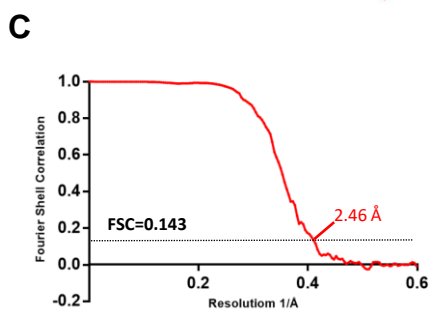

**Figure supplement 3: Cryo-EM data processing scheme of the TRPML1 sample prepared in the presence of PI(4,5)P<sub>2</sub>.** (a) Representative micrograph. (b) Flow chart of the cryo-EM data processing procedure and the Euler angle distribution of particles used in the final three-dimensional reconstruction. Selected 2D class averages are shown. The final structure represent an open state. (c) Fourier Shell Correlation curves showing the overall resolution at FSC=0.143.

**A**

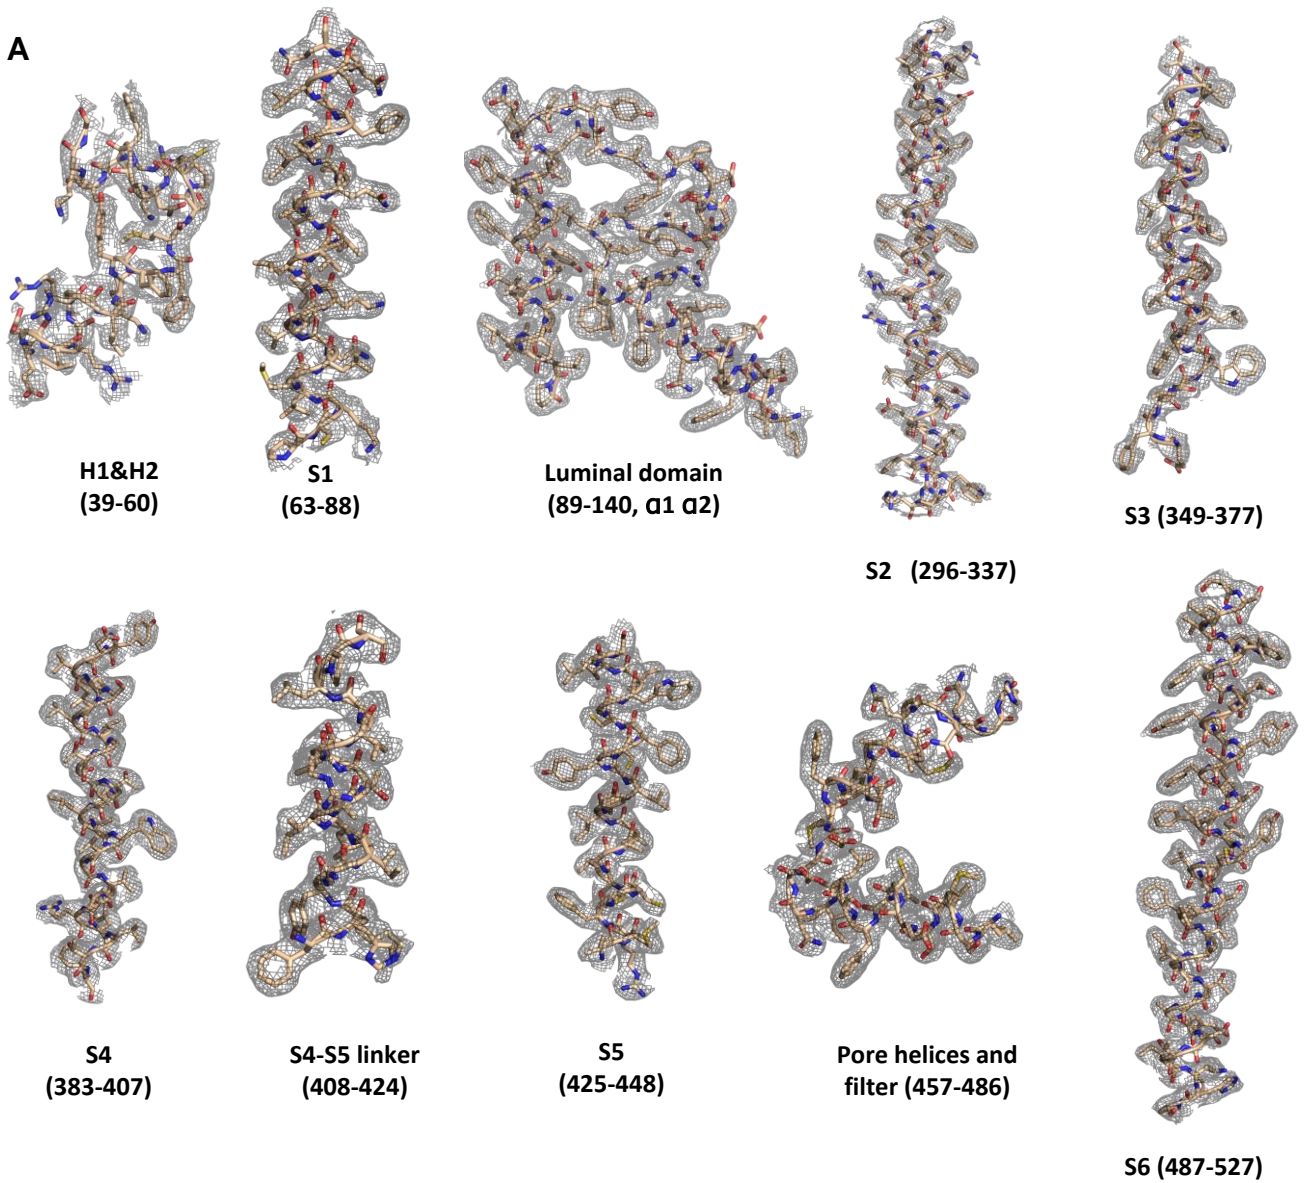

**Figure supplement 4 : Sample density maps of the PI(4,5)P<sub>2</sub>-bound closed TRPML1 structure contoured at 4  $\sigma$ .**

**Top View**

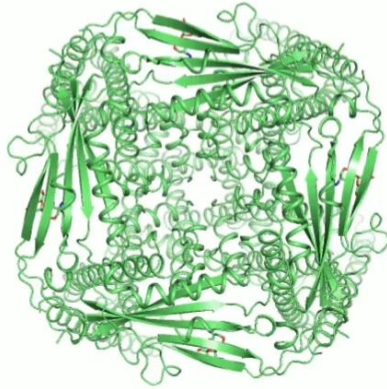

**Movie supplement 1. Conformational changes between open and closed TRPML1**
